# Supplementary material
Source: PubMed Central journal article supplement (PMC9112609)
Supplement: mmc1.pdf [file mmc1.pdf]

expectedInfluence

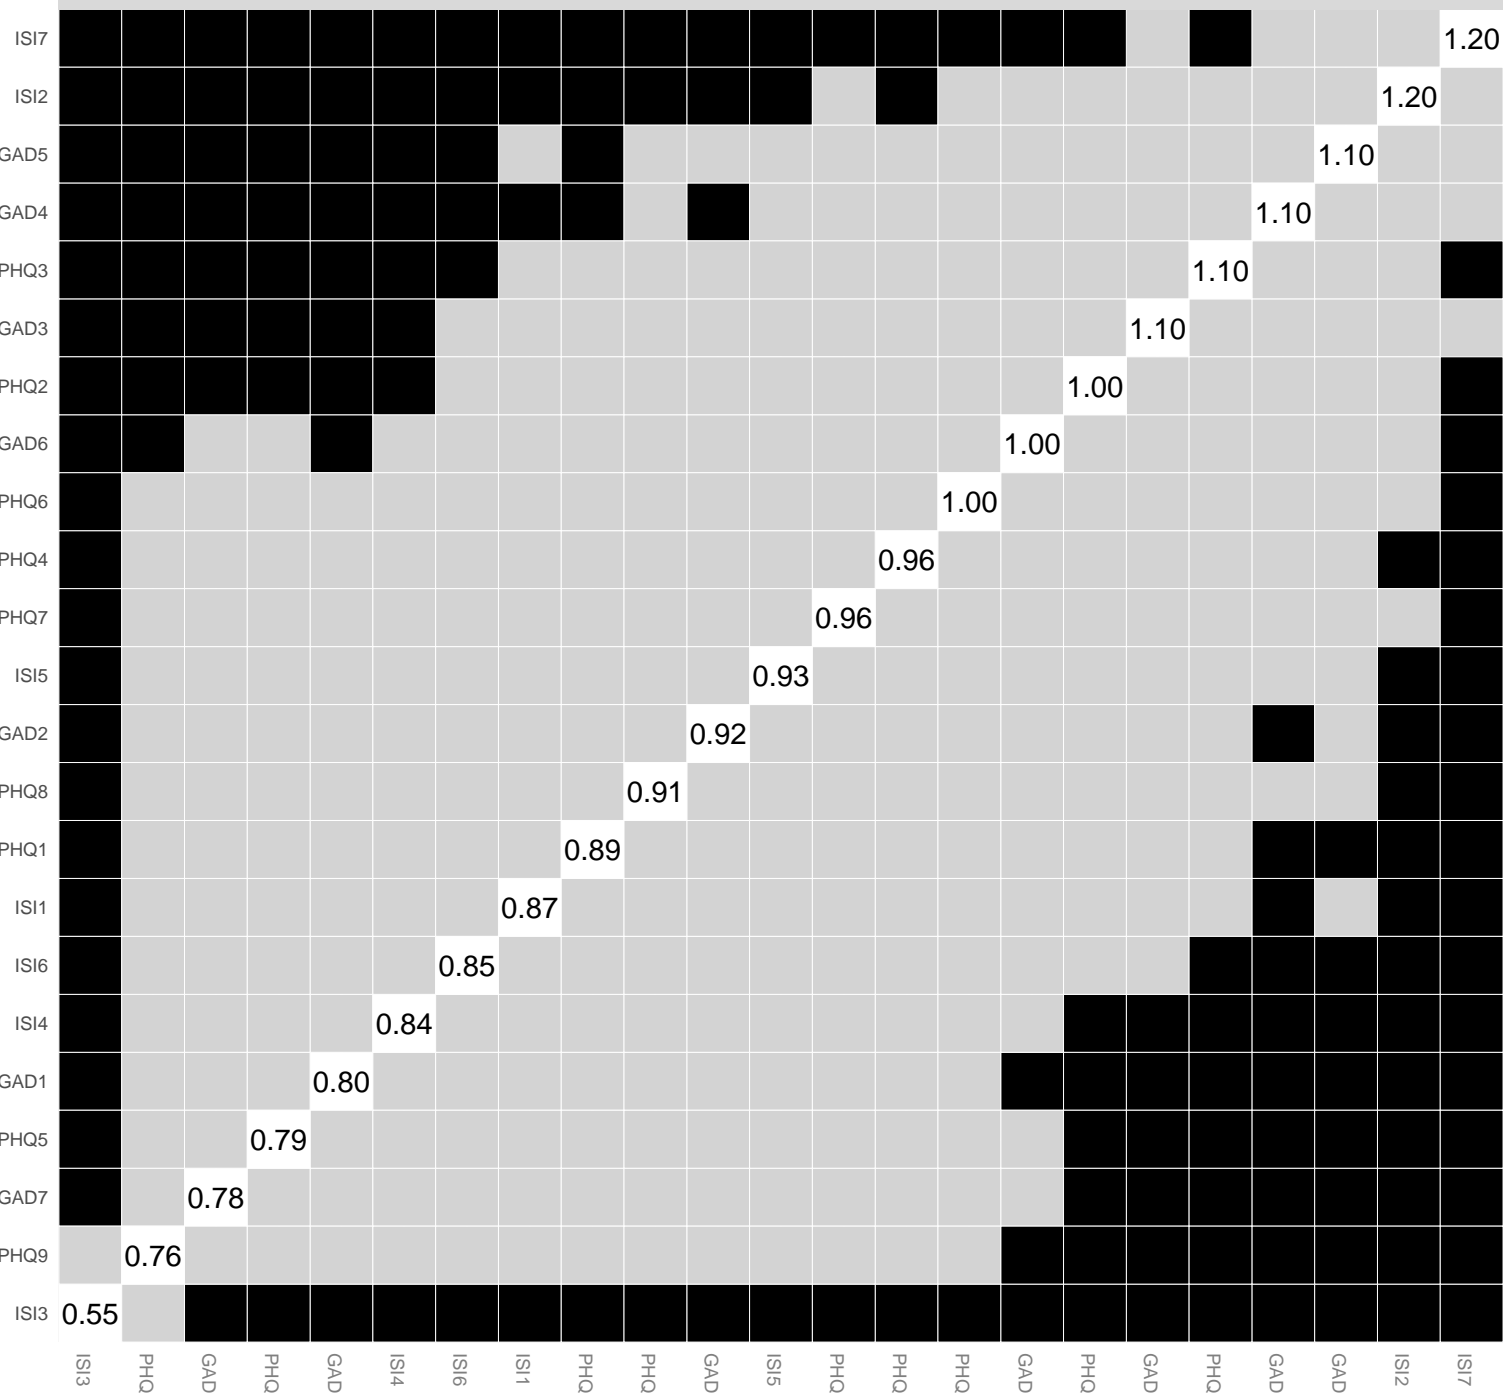

ISI3

PHQ9

GAD7

PHQ5

GAD1

ISI4

ISI6

ISI1

PHQ1

PHQ8

GAD2

ISI5

PHQ7

PHQ4

PHQ6

GAD6

PHQ2

GAD3

PHQ3

GAD4

GAD5

ISI2

ISI7
