# Supplementary material
Source: PubMed Central journal article supplement (PMC9112609)

Female (n=634)

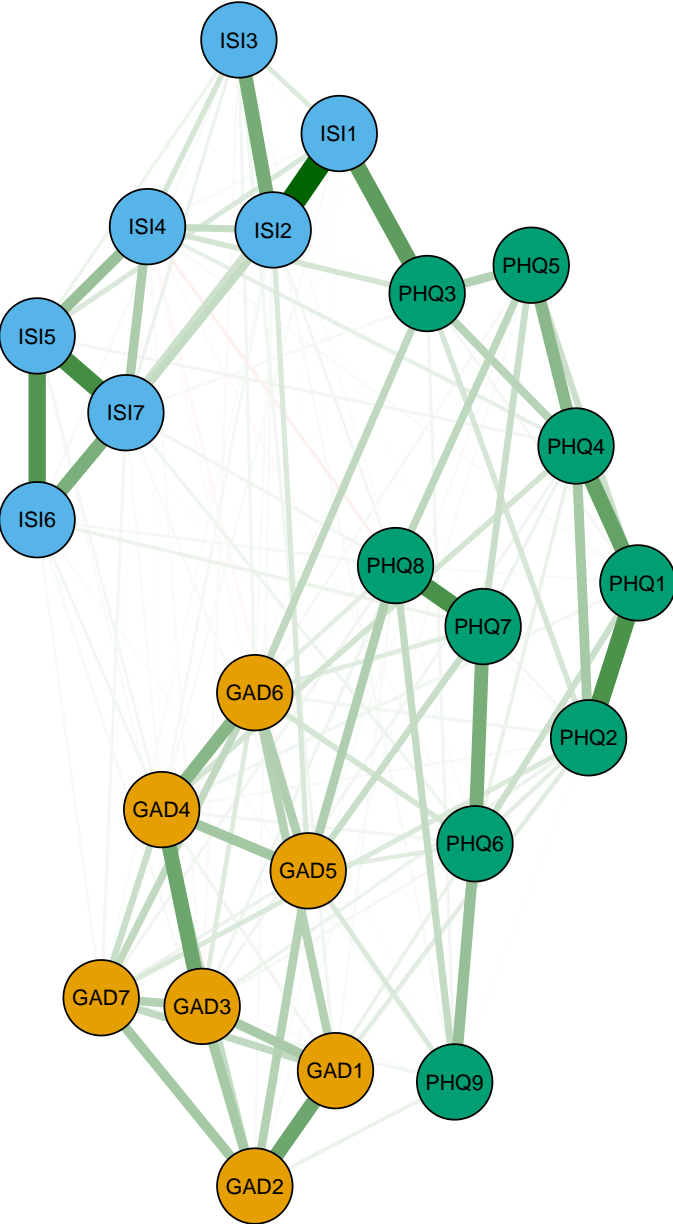

Male (n=341)

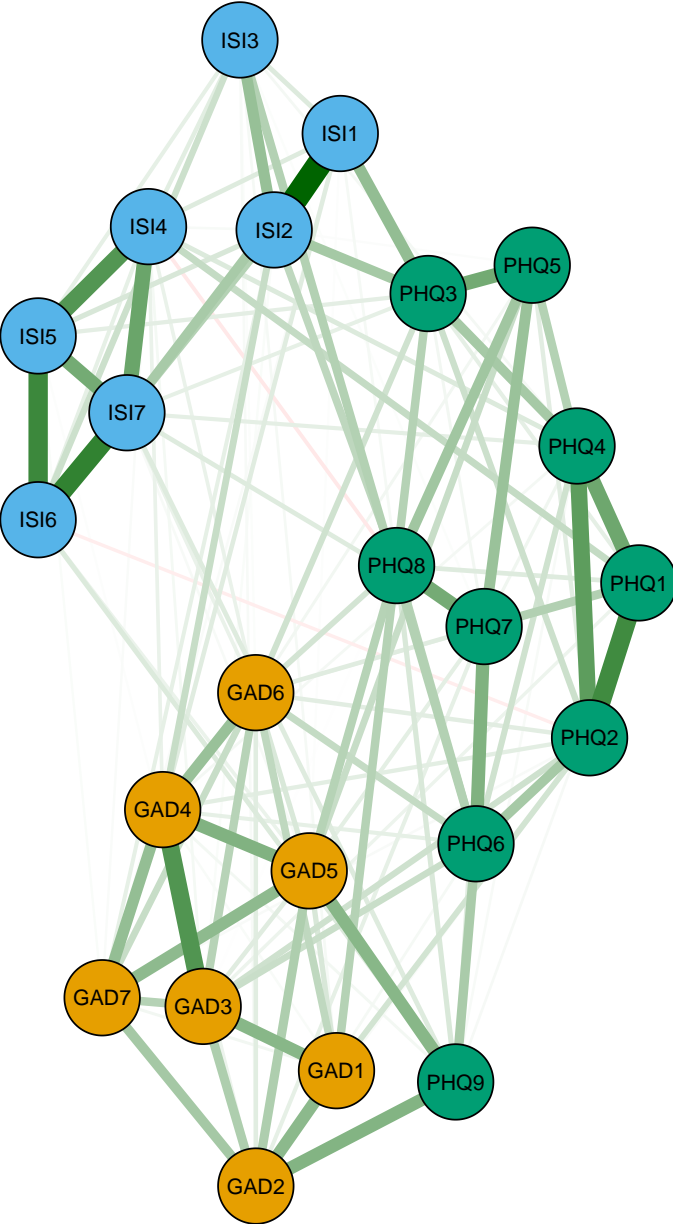

Supplement: mmc2.pdf [file mmc2.pdf]

**p = 0.841**

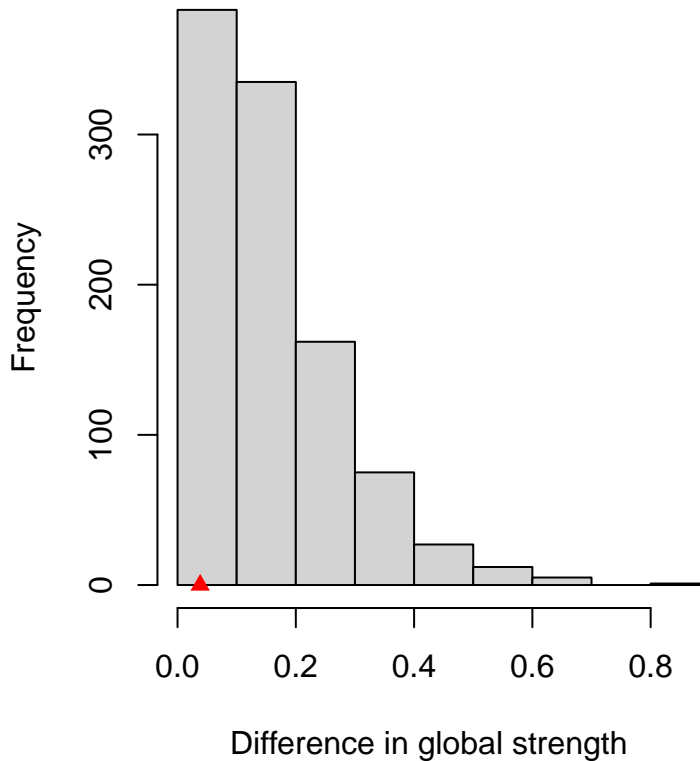

**p = 0.906**

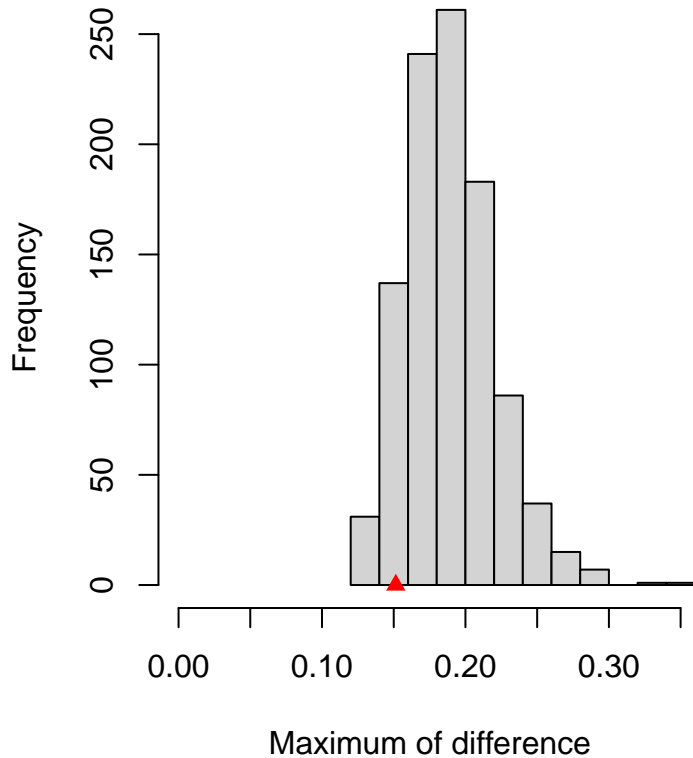

Supplement: mmc3.pdf [file mmc3.pdf]
